# Supplementary material
Source: PubMed Central journal article supplement (PMC5096916)
Supplement: jci-126-78260-s001.pdf [file jci-126-78260-s001.pdf]

**SUPPLEMENTAL DATA** (Naschberger, Liebl et al.)

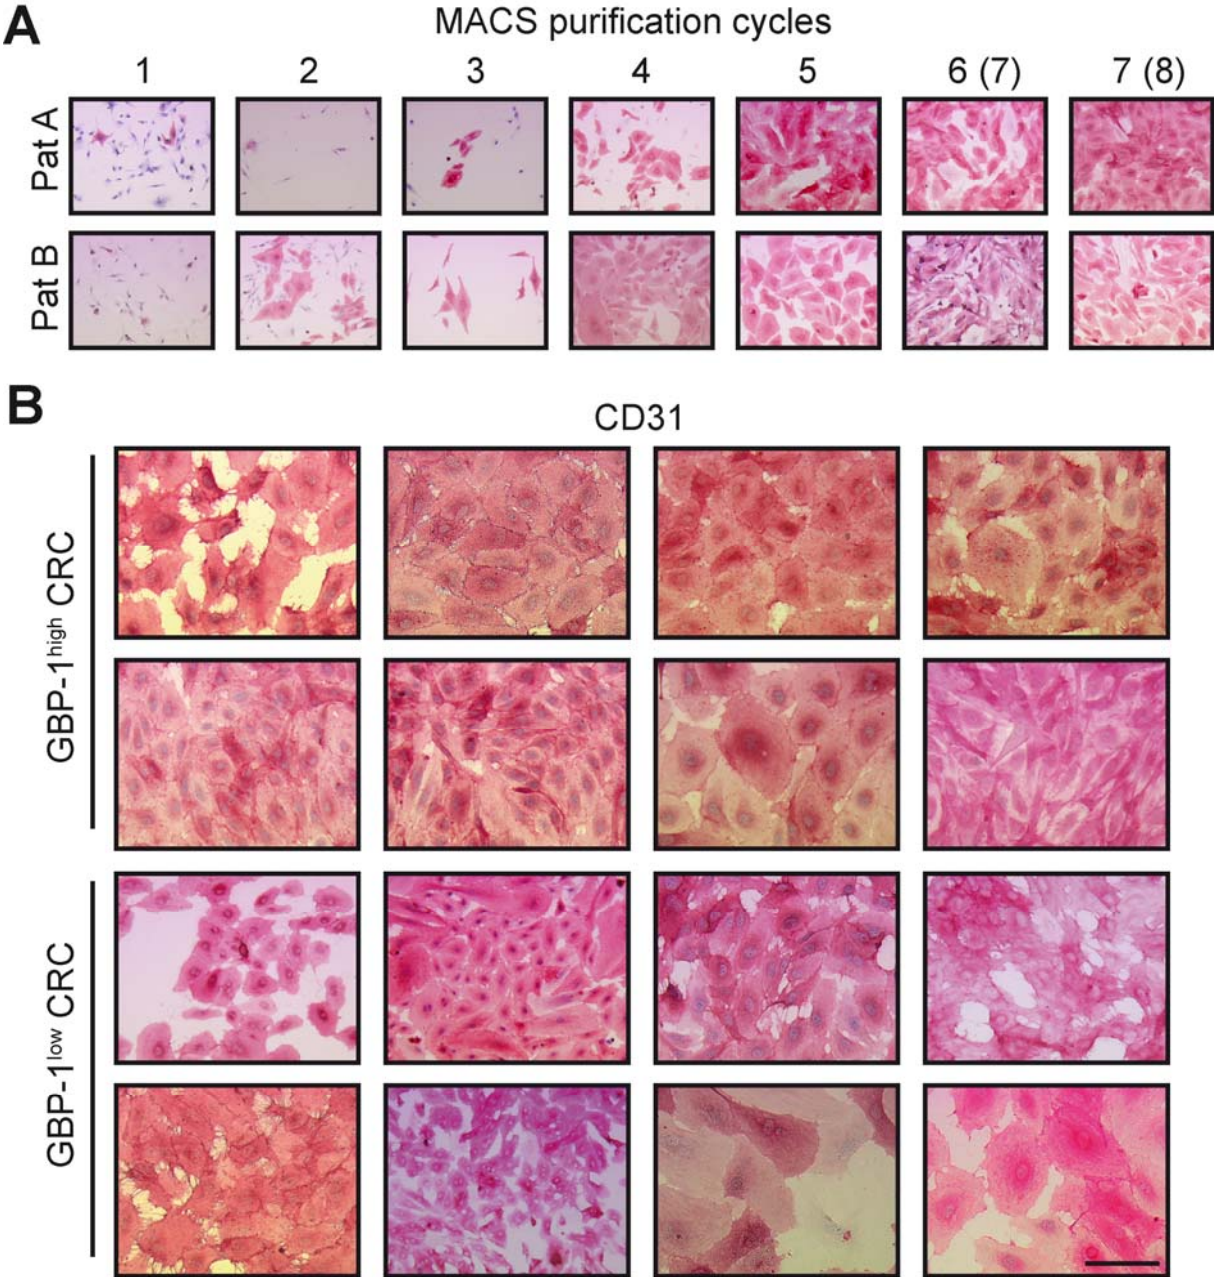

**Supplemental Figure 1. CD31 staining of tumor endothelial cells isolated from colorectal carcinomas with GBP-1<sup>high</sup> or GBP-1<sup>low</sup> expression.** (A) Enrichment and purity of tumor endothelial cells isolated from human colorectal carcinoma patients was monitored directly before and 24 hr after each MACS purification cycle by CD31 immunocytochemistry. Here, the results for two different patients after MACS purification are depicted as an example. MACS cycles in brackets are referring to patient A, without brackets to patient B. (B) Tumor endothelial cells were isolated from human colorectal carcinoma patients with either high (n=8) or low (n=8) GBP-1 expression in the tumor tissue. CD31 immunocytochemistry is depicted for all of the analyzed tumor endothelial cell cultures (n=16). Scale bar, 100 μm.

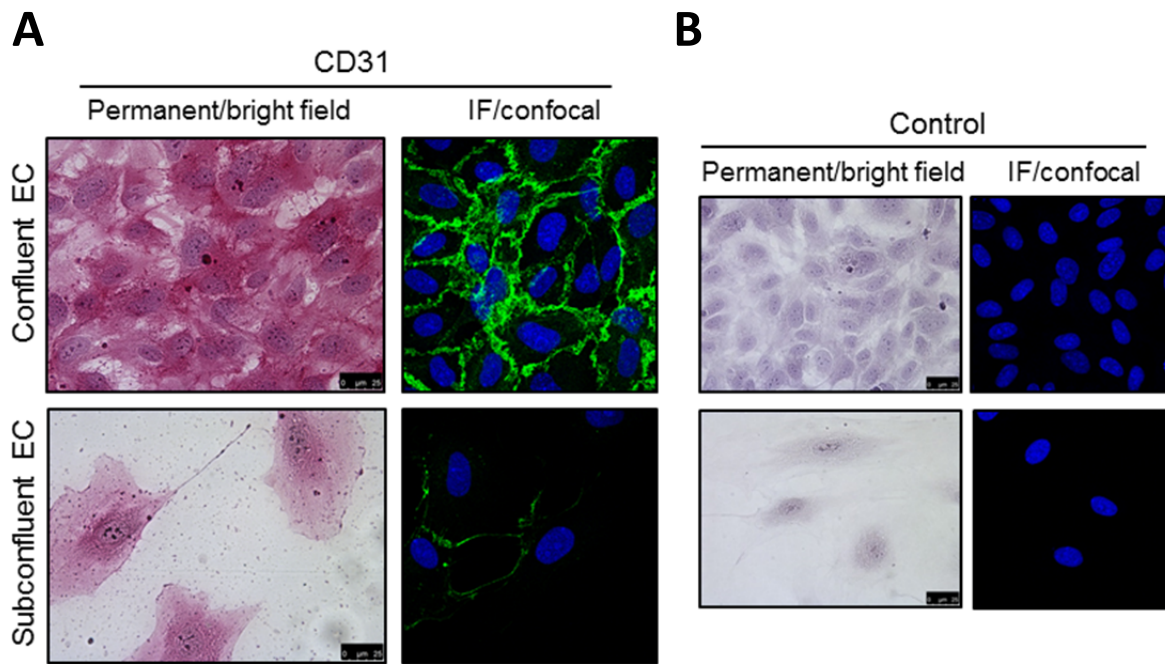

**Supplemental Figure 2. Increased sensitivity of immunocytochemical staining of CD31 by permanent APAAP staining as compared to immunofluorescence resulting in different staining patterns.** HUVEC were seeded at confluent and subconfluent densities and were immunocytochemically stained for **(A)** CD31 by permanent APAAP staining combined with bright field imaging as well as immunofluorescent (IF) staining followed by confocal imaging. **(B)** Negative controls for both stainings are depicted referring to a staining without the primary antibody. APAAP staining resulted in increased signal intensities in subconfluent cultures. Increased sensitivity resulted in staining of cytoplasmic CD31 which was not detected by the immunofluorescent staining procedure.

c6: oncogenic gene sets (FDR <25%)

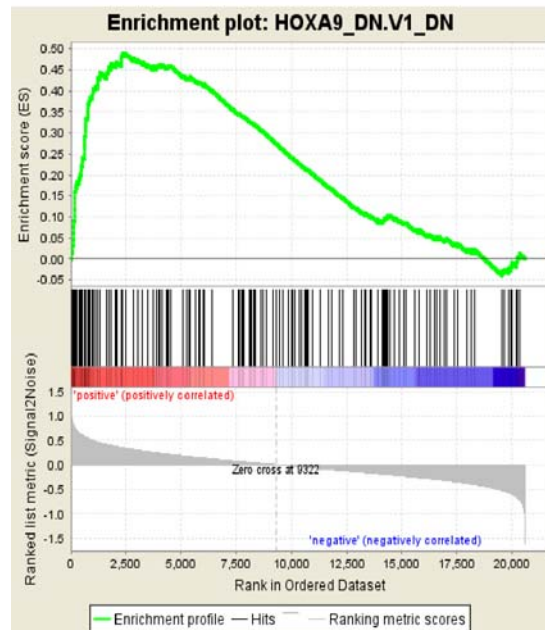

**Supplemental Figure 3. Gene set enrichment plot of TEC transcriptomes from GBP-1<sup>high</sup> compared to GBP-1<sup>low</sup> CRC.** RNA was isolated from TEC from GBP-1<sup>high</sup> and GBP-1<sup>low</sup> CRC, analyzed by hybridization to HG-U133-Plus 2.0 gene chips (Affymetrix) and gene set enrichment analysis (GSEA) was performed. The detailed lists of the identified features are given in Supplementary Table 4 and the enriched gene sets in Supplementary Table 5. The enrichment plot of the significantly enriched gene set HOXA9\_DN.V1\_DN (FDR of 0.073) associated with GBP-1<sup>high</sup> TECs is depicted.

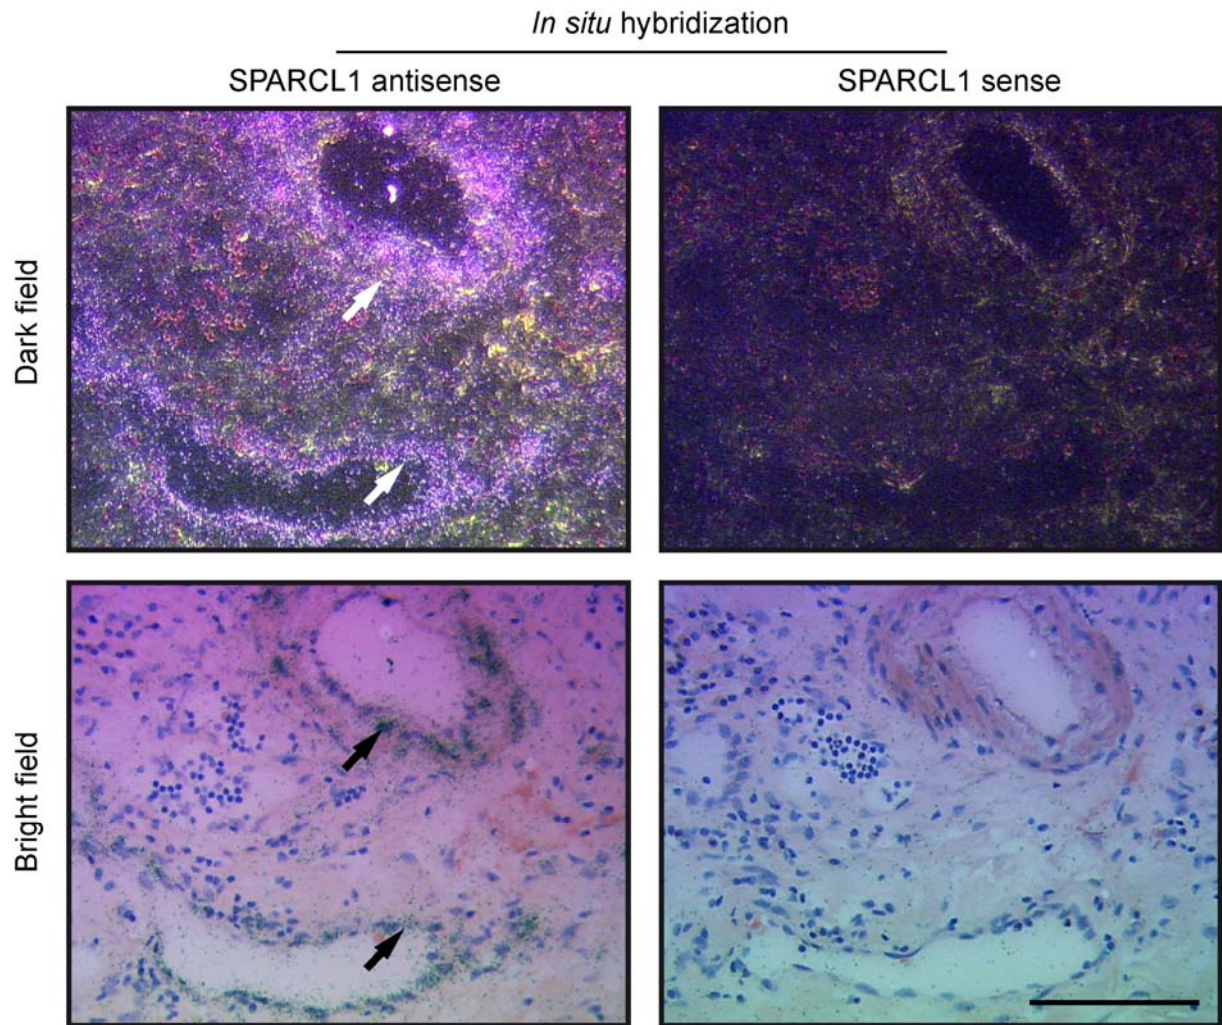

**Supplemental Figure 4. SPARCL1 is expressed by vessels in colorectal carcinoma at the RNA level as detected by  $S^{35}$ -radioactive *in situ* hybridization.** *In situ* hybridization on CRC tissue sections with SPARCL1-mRNA specific antisense and sense RNA probes was performed. Autoradiography signals appear in the bright field as black grains and in the dark field as white grains and are indicated by arrows. Scale bar, 100  $\mu$ m.

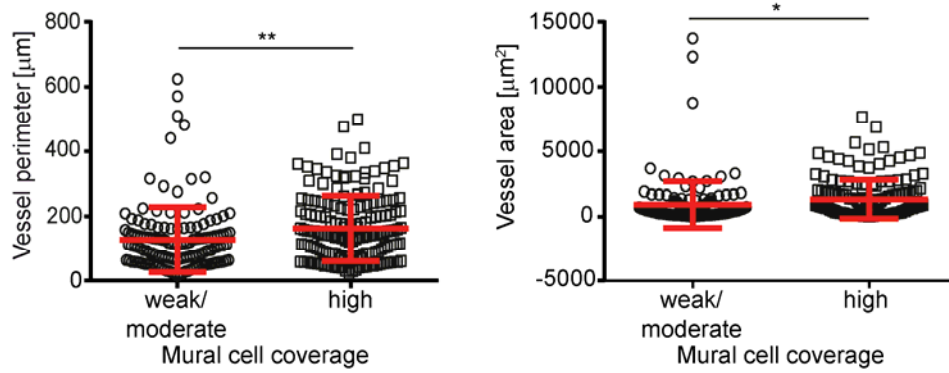

**Supplemental Figure 5. Vessel size is significantly increased in vessels with high mural cell coverage.** Vessel perimeters (left) and areas (right) were quantified for vessels evaluated in Fig. 7C. The vessel sizes are given in relation to weak/moderate and high mural cell coverage and are depicted as dot plot (red lines representing mean values and standard deviation). Statistical significances were determined by student's t-test (p-value \* $<0.05$ , \*\* $<0.01$ ).

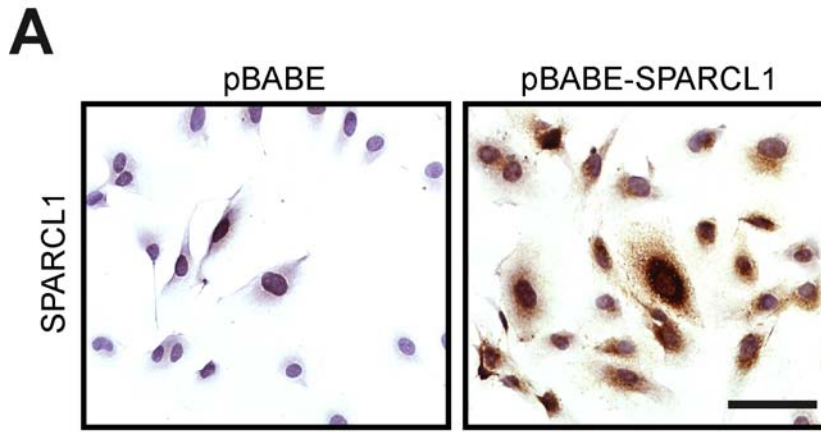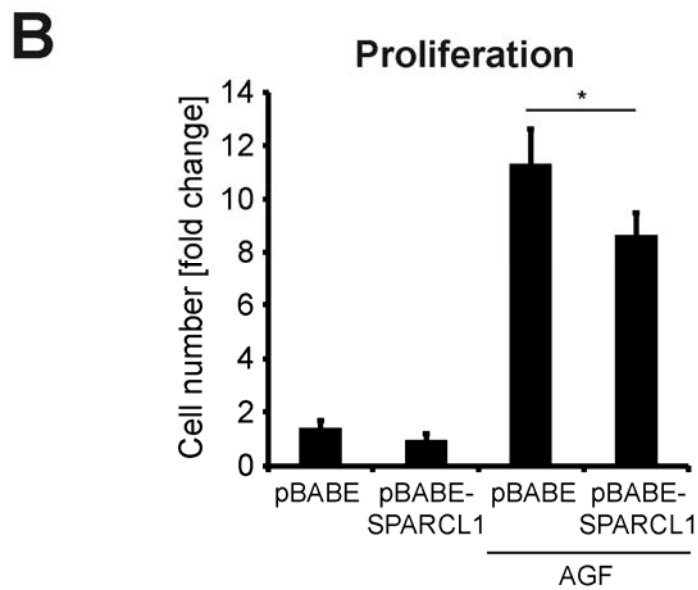

**Supplemental Figure 6. Stable overexpression of SPARCL1 inhibits AGF-induced proliferation of EC.** HUVEC were stably transduced by a retroviral SPARCL1-encoding vector (pBABE-SPARCL1) and the corresponding control vector (pBABE). **(A)** The cells were immunocytochemically stained for SPARCL1 expression (brown) and counterstained by hematoxylin (blue). Scale bar, 75  $\mu$ m. **(B)**. SPARCL1-transduced cells showed a significant inhibition of angiogenic growth factors (AGF=combined bFGF/VEGF, 10 ng/ml each)-induced proliferation by SPARCL1 (Student's t-test).

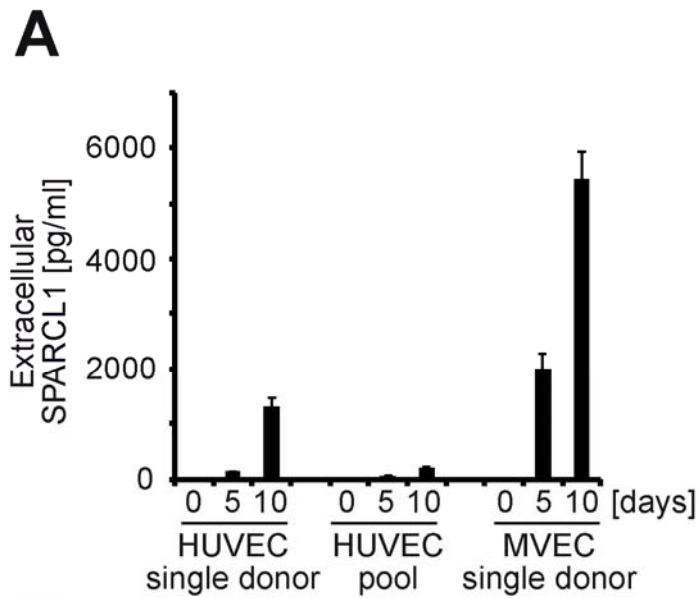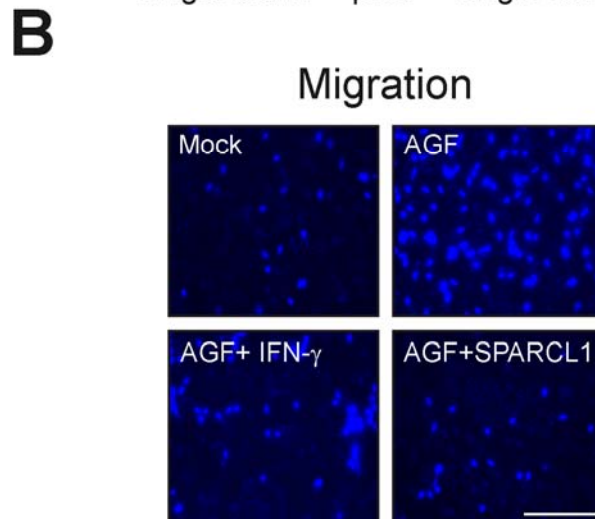

**Supplemental Figure 7. SPARCL1 is secreted and inhibits migration of HUVEC.** (A) Different cultures of HUVEC and MVEC were grown and at days 0, 5 and 10 conditioned media were harvested after 24 hr. Concentrations of secreted SPARCL1 were determined by SPARCL1-ELISA. (B) HUVEC were either untreated (mock) or treated with AGF (positive control), with AGF combined with IFN- $\gamma$  (100 U/ml, negative control) or AGF with recombinant SPARCL1 (1.5  $\mu$ g/ml). HUVECs were plated on transwell inserts, stimulated and analyzed after six hours. Migrated cells at the lower membrane side were determined by counterstaining with DAPI and representative images acquired by fluorescence microscopy are depicted (quantification compare Fig. 8D). Scale bar, 250  $\mu$ m.

**A**

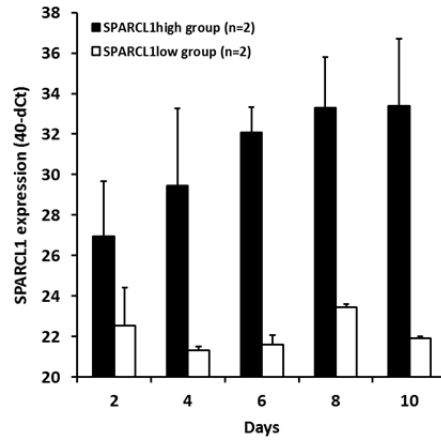

**B**

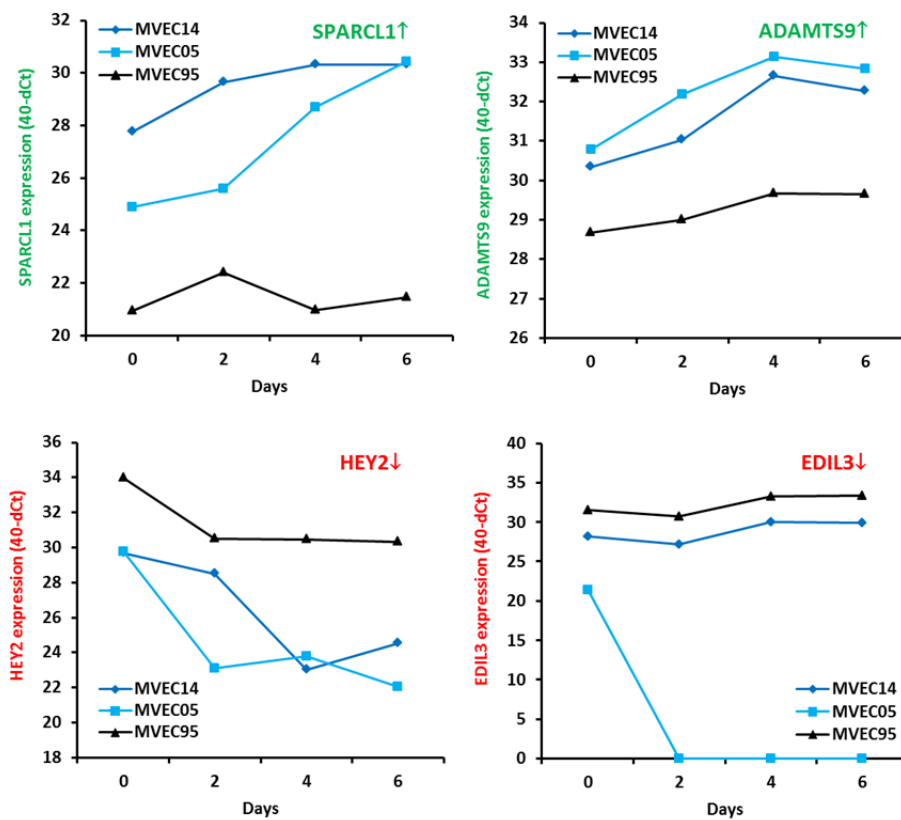

**Supplemental Figure 8. Gene expression of SPARCL1, ADAMTS9, HEY2 and EDIL3 is consistently different between SPARCL1<sup>high</sup> and SPARCL1<sup>low</sup> EC during several days of cultivation.** (A) SPARCL1<sup>high</sup> (black, n=2) and SPARCL1<sup>low</sup> (white, n=2) EC were seeded (day 0) and RNA extracts were harvested at the indicated time points. SPARCL1 mRNA expression levels were determined by RT-qPCR and the mean with standard deviation is depicted for each group. (B) SPARCL1<sup>high</sup> (MVEC14 and MVEC05; blue rhombuses, light blue squares) and SPARCL1<sup>low</sup> (MVEC95, black triangles) MVEC were seeded at the same cell density and RNA extracts were harvested at the indicated time points during 6 days. SPARCL1, ADAMTS9 (upregulated genes in TECs from GBP-1<sup>high</sup> CRC) and HEY2, EDIL3 (downregulated genes in TECs from GBP-1<sup>high</sup> CRC) RNA expression levels were determined by RT-qPCR. In all cases the differential gene expression between the groups was maintained.



## Supplemental material and methods

### Proliferation assays

#### EdU incorporation assay

Click-iT®EdU Alexa Fluor® 555 Imaging Kit (Life Technologies) was used to detect proliferating cells in transiently transfected EC. EdU was allowed to incorporate into the DNA of the cells for 2 hr. Afterwards, the cells were fixed with 10% formalin (neutral buffered, Sigma-Aldrich) for 10 min at RT and permeabilized for 30 min using 0.1% Triton-X (Sigma-Aldrich) in 1x PBS. The Click-iT reaction was performed according to the manufacturer's protocol.

#### Cell counting

HUVEC or SMC were seeded with a density of 3,000 cells/well in 24-well plates (for EC gelatin-coated) in the respective full medium (day 0). After 12 hr the medium was changed to low medium (basal medium with 0.5% FBS without supplements) for 12 hr. The cells were stimulated at day 1, 3 and 5, and the total cell number was determined at day 7 using a CASY TT cell counter (Schärfe Systems GmbH, Reutlingen, Germany). Each experiment was carried out in triplicates. The results are given as mean cell number with standard deviation.

### Migration assays

#### Transmigration assay

HUVEC were seeded with  $7.5 \times 10^4$  cells/well, SMC with  $1 \times 10^5$  cells/well in 8  $\mu\text{m}$  pore size Thincert cell culture inserts (Greiner, Frickenhausen, Germany) and put into 24 well-plates. HUVEC were stimulated for 6 hr (upper compartment), SMC for 4 hr (SMC: PDGF lower compartment, SPARCL1/IFN- $\gamma$  upper compartment). Non-migrating cells were removed from the upper membrane with a swab. The cells were washed with 1xPBS and fixed with cold ethanol (4°C) for 24 hr. Nuclear staining was performed using DAPI (Life Technologies) for 10 min at RT and pictures of the membrane were acquired on a TCS SPE microscope (Leica). Cell numbers were determined by counting the total nuclei per optical field. All stimulations were performed in triplicates and five optical fields were counted per well. The results are given as mean cell number per optical field.

#### Scratch assay

MVEC were seeded with  $3 \times 10^4$  cells/cm<sup>2</sup> in gelatine-coated 4-well chamber slides (BD Biosciences) and were cultivated for 4 days. At day 5 the monolayer was scratched using a 10  $\mu\text{l}$  pipette tip. The cells were washed two times with sterile PBS and then incubated in EGM2-MV full medium. Cells were harvested before scratching or 14/48 hr post scratch, fixed with 10% formalin (neutral buffered, Sigma-Aldrich) for 10 min. SMC scratch assay was performed by cultivating the cells in 6-well plates until confluency, followed by combined overnight starvation/stimulation and wounding/repeated stimulation of the cells with the indicated factors on the day after. Closure of the wound was quantified every 2 hr until 10 hr using TScratch software.

### **3D sprouting angiogenesis assay (spheroid assay)**

Generation of spheroids: HUVEC (Promocell) were trypsinized and resuspended in ECGM containing 20% methocel. Methocel stock solution was prepared by dissolving 6 g carboxymethylcellulose (Sigma-Aldrich) in 500 ml ECGM basal medium, cleared through centrifugation at  $2,500 \times g$ , 2 hr, RT and stored at 4°C. Spheroids were generated by the hanging drop method. To this goal, a cell suspension of  $1.6 \times 10^4$  cells/ml was prepared and 500 drops with 25 µl volume were pipetted on a cell culture dish. The dish was turned upside down and the cells were incubated for 24 hr at 37°C and 5% CO<sub>2</sub>. For harvesting spheroids were rinsed from the dishes using 1x PBS, collected in 50 ml tubes and centrifuged for 3 min at  $500 \times g$  at 20°C.

3D in vitro angiogenesis assay: to quantify the ability of spheroids to form sprouts after different treatments the spheroids were embedded in a collagen/methocel gel. The outer wells of a 24-well plate were filled with 1x PBS to avoid evaporation and the plates prewarmed in the incubator at 37°C. M199 (0.5 ml, 10x M199, Life Technologies) was mixed with 5 ml of rat tail collagen (Collagen R solution 0.2%, Serva, Heidelberg, Germany) and incubated on ice for at least 15 min. The harvested spheroid pellet was resuspended in 5 ml FCS-containing methocel (20% FCS, 80% methocel). The medium-containing collagen was neutralized using cold 0.2 N NaOH until the pH-indicator turned from yellow to red. Neutralized collagen was carefully mixed with the spheroid-containing methocel and poured into the inner wells of the prewarmed 24 well plate (1 ml/well). Gels were incubated for 30 min to polymerize. The gels were overlaid with 100 µl ECGM basal medium containing the recombinant proteins for stimulation in a 10x concentration. Finally, the gels were incubated for 24 hr at 37°C, 5% CO<sub>2</sub> and were fixed with 10% formalin (neutral buffered, Sigma-Aldrich). Sprouts were evaluated acquiring pictures of 10 spheroids/well with a TCS SPE microscope (Leica). All stimulations were performed as duplicates. All sprouts were quantitatively measured using the LAS-AF software (Leica). The results are given as mean cumulative sprout length of 20 spheroids per stimulation.

### **Isolation of RNA from cell culture and human colon/CRC tissues**

RNA from cells was isolated using the RNeasy mini kit (Qiagen). DNA digestion was performed as suggested by the manufacturer using the RNase-Free DNase Set (Qiagen). RNA quantity was determined using a Nanodrop 2000c (PqLab, Erlangen, Germany). In all cases the standard protocols of the manufacturer were followed.

RNA isolation from human colon/CRC tissue: RNA was isolated using a fully automated extraction method from FFPE tissue (Tissue Preparation System with VERSANT Tissue Preparation Reagents, Siemens Healthcare Diagnostics, Tarrytown, NY) and has been described previously (1, 2). In brief, 10 µm paraffin sections (tumor content >30%) were directly subjected to automated total nucleic acid extraction. Samples were heat-lysed in 150 µl FFPE buffer at 80°C for 30 min with shaking. After cooling, enzymatic lysis was carried out at 65°C for 30 min with proteinase K. Any residual tissue debris was removed by nonspecific binding to silica-coated iron-oxide beads and subsequent magnetic separation. Deparaffinized and clarified lysates were transferred to new tubes and nucleic acids were bound to fresh silica-coated beads under chaotropic conditions. Beads were washed 3 times and total nucleic acids were eluted with 100 µl of elution buffer at 70 °C followed by an automated DNase I digestion.

## RT-qPCR

RT-qPCR primers and 5'-FAM-3'-TAMRA-labeled probes were designed using Primer Express 3.0 (Applied Biosystems, Carlsbad CA, USA) or PrimerBlast (NCBI). In case of multiple transcripts for one gene all of them were aimed to be targeted. All primers/probes were checked for specificity using BLAST (NCBI) and controlled for single nucleotide polymorphisms. Exon/intron junctions were spanned if possible. The primers and probes were purchased by Eurogentec (Serain, Belgium). The RNA primer/probe sequences were: CD105/endoglin (NM\_001114753.2): forward GTGACATATACCACTAGCCAGGT, probe CGTGGCTCAGGCCCAATG, reverse CCAGGTGCCATTTTGCTTGG; CD31/PECAM-1 (NM\_000442.4): GAGGTTCTGAGGGTGAAGGTGA, AGCCCCGGTGGATGAGGTCCAGA, TCCACCACCTTACTTGACAGGA; CD45/PTPRC (NM\_002838.4): TGACTTCTCAGAGACCACAACCTT, TCCACCCAAGTATCCCCGGACT, GTGAGGCGTCTGTACTGATGAA; CK-20 (NM\_019010.2): AAAAGGAACTGAGGTTCAACTAAC, AGACGCACCTCCCAGAGCCT, TTGGCTAACTGGCTGCTGTAA; Desmin (NM\_001927.3): GAGGAGAGCCGGATCAATCTC, ATCCAGACCTACTCTGCCCTCAACTTCCG, GGACCTCAGAACCCCTTTGC; GLB1 (SA- $\beta$ -GAL, NM\_000404.2): CGGGGTTCTGGTTCGCAT, TGCGCAATGCCACCCAGAGG, CTTGAGGAAGGAGTCCCGGC; RPL37A (NM\_000998.4): TGTGGTTCCTGCATGAAGACA, TGGCTGGCGGTGCCTGGA, GTGACAGCGGAAGTGGTATTGTAC; SPARCL1 (NM\_001128310.1): GGAATTAAGAAGAGGACATAGATGAA, TCAACTTCCAGCATCCTCCTCTGTTCTAA, ATATAAATCTACAAGTATCACAGCTGCAT; VE-cadherin (NM\_001795.3): ATGCGGCTAGGCATAGCATT, TCCATCCGCAGGACCAGTGACA, TGTGACTCGGAAGAACTGGC; vWF (NM\_000552.3): TCTGTGGATTCAAGTGGATGCA, CGCCAGGTCCAACAGAGTGACAGTGT, CGTAGCGATCTCCAATTCCAA. The DNA primer/probe sequences were: *PAEP* (gene ID 5047): CACAGAATGGACGCCATGAC, AAGCCCTCAGCCCTGCTCTCCATC, AAACCAGAGAGGCCACCCTAA. The SuperScript III Platinum One-Step Quantitative RT-PCR-System with ROX (Life Technologies) was used as recommended by the manufacturer except for a prolonged reverse transcription time of 30 min at 50°C. A reaction (10  $\mu$ l total volume) consisted of 0.2  $\mu$ l RT/Taq-mix, 50 nM ROX Reference Dye (Life Technologies), 10 ng total RNA, 500 nM forward/reverse primer each and 250 nM probe. The reactions were assayed in triplicates in 96-well-qPCR-plates (Agilent Technologies, Santa Clara, CA, USA) using a Mx3005P qPCR system (Agilent) together with the Versant kPCR software (Siemens Healthcare Diagnostics). For quantification of RNA samples the absence of residual DNA was analyzed by DNA-specific primers for the *progesterone-associated endometrial protein (PAEP)* gene and was in all cases negative. On each plate a commercial qPCR human reference total RNA (qRef, Agilent) was used as a positive control and a non-template control (NTC) as negative control. The fluorescence threshold (ROX dRn) was set to 0.02 for all samples. All samples were normalized using RPL37A (mean of triplicates) as a reference gene. Subsequently, the  $\Delta\Delta$ CT-method was used for calculation of the respective fold changes for each target gene. The patient characteristics as analyzed by RT-qPCR are detailed in Supplementary Table 8.

## Immunocytochemistry

### Immunofluorescent cytochemistry

For SPARCL1, Ki-67 and IL-33 immunofluorescence detection microvascular ECs (MVEC) and human umbilical vein ECs (HUVEC) were seeded at a density of 30,000 cells/cm<sup>2</sup> and harvested after 12/24 hr (subconfluent) or 4/10/15/22 days (confluent). Subsequently, the cells were washed with PBS and fixed for 10 min at RT with 10% formalin (neutral buffered, Sigma-Aldrich, Munich, Germany). The cells were washed twice on a shaker with 0.45  $\mu$ m

filtered TBS for 5 min, permeabilized using 0.1% Triton-X 100 (Sigma) in TBS for 30 min and blocked using 10% normal donkey serum (DNS, Vector Laboratories, Burlingame, CA, USA) in TBS for 10 min. Staining with primary antibodies was performed for 1 hr as follows: polyclonal goat anti-human SPARCL1 (R&D Systems, cat.no. AF2728, 0.4 µg/ml), monoclonal mouse anti-human IL-33 (Enzo Life Sciences, Lörrach, Germany, Nessy-1, 5 µg/ml) and monoclonal mouse anti-human Ki-67 (DakoCytomation, Hamburg, Germany, clone MIB-1, 7.2 µg/ml). Next, secondary antibodies (donkey anti-goat IgG Alexa 488, cat.no. A11055; donkey anti-mouse IgG Alexa 546, cat.no. A10036, Life Technologies, all 1:500) were incubated for 45 min on the slides and the nuclei were counterstained with DAPI (Life Technologies, 1:5,000). The slides were mounted using fluorescence mounting medium (DakoCytomation) and pictures were acquired using a DM6000 B epifluorescent or a TCS SP8 confocal microscope (Leica Microsystems GmbH, Wetzlar, Germany).

#### Permanent cytochemistry

CD31 permanent immunocytochemistry was performed as previously described (3, 4). Suspension cells (THP-1, Jurkat) were air dried in chamber slides and fixed overnight using 4°C ethanol. For SPARCL1 permanent immunocytochemistry the primary antibody (compare above) was detected using Vectastain Elite ABC-AP System (Vector Laboratories) and NovaRed substrate (Vector Laboratories). The slides were counterstained with Gill-III hematoxylin (Merck, Darmstadt, Germany), dehydrated and mounted with VectaMount permanent mounting medium (Vector Laboratories). The sections were analyzed using a DM6000 B microscope (Leica).

#### **Immunohistochemistry**

##### Immunofluorescent histochemistry

GBP-1 and CD31 immunohistochemistry was performed as previously described (5). The characteristics of the respective patients are detailed in Supplementary Table 7. Fluorescent immunohistochemistry was performed using formalin-fixed, paraffin-embedded tissue deparaffinized by xylene two times for 15 min. The tissue was rehydrated using decreasing concentrations of ethanol (100%, 96%, 85%, 70%) for 2 min each. Antigen retrieval was performed using Target Retrieval Solution (DakoCytomation), either at pH 9.0 (SPARCL1/CD31/ $\alpha$ -SMA) or citrate at pH 6.0 (SPARCL1/CD31) at 95°C for 20 min followed by cooling for 20 min at RT. As a washing buffer between the incubation steps 0.45 µm filtered 1xTBS pH 7.6 was used. The slides were blocked by 10% DNS (Vector Laboratories) in TBS for 10 min. Next, the slides were incubated with the following primary antibodies in different combinations: polyclonal goat anti-human SPARCL1 antibody (R&D Systems, cat.no. AF2728, 4 µg/ml), monoclonal mouse anti-human CD31 (DakoCytomation, clone JC70A, 20.5 µg/ml) or polyclonal rabbit anti-human CD31 (Thermo Scientific, cat.no. RB-10333-P, 4 µg/ml), monoclonal mouse anti-human  $\alpha$ -SMA (DakoCytomation, clone 1A4, 0.9 µg/ml), polyclonal goat anti-mouse SPARCL1 (R&D Systems, cat.no. AF2836, 2.5 µg/ml), monoclonal rat anti-mouse CD31 (Dianova, Hamburg, Germany, clone SZ31, 2 µg/ml) and monoclonal rabbit anti-mouse  $\alpha$ -SMA (Abcam, Cambridge, United Kingdom, cat.no. ab124964, 0.128 µg/ml) as well as isotype controls normal goat IgG, normal rabbit IgG, normal mouse IgG1, and normal mouse IgG2A (all R&D Systems) in the same final concentrations as the respective detection antibodies in 5% DNS-TBS for 1 hr. Then the slides were incubated with the following secondary antibodies in different combinations: donkey anti-goat IgG Alexa 488 (cat.no. A11055), donkey anti-goat IgG Alexa 546 (cat.no. A11056), donkey anti-mouse IgG Alexa 647

(cat.no. A31571), donkey anti-rabbit IgG Alexa 546 (cat.no. A10040), donkey anti-rabbit IgG Alex 647 (cat.no. A31573, all Life Technologies, 1:500) and donkey anti-rat cross adsorbed IgG DyLight 488 (Thermo Scientific, cat.no. SA5-10026, 1:500) for 45 min. Nuclei were counterstained with Draq5 (Cell Signaling, Danvers, MA, USA, 1:800) or DAPI (Life Technologies, 1:5000) in water for 10 min and the slides were mounted with fluorescence mounting medium (DakoCytomation). Pictures were acquired using a TCS SP5 and SP8 confocal microscope (Leica).

#### Permanent histochemistry

For SPARCL1 permanent immunohistochemistry the staining was performed as described above with the following alterations: the polyclonal goat anti-human SPARCL1 antibody (R&D Systems, 0.5 µg/ml) as well as the isotype control normal goat IgG (R&D Systems, 0.5 µg/ml) were diluted in background reducing antibody diluent (DakoCytomation). The primary antibodies were detected using Vectastain Elite ABC-AP System (Vector Laboratories) and liquid permanent red (DakoCytomation, 30 min) as a substrate. The slides were counterstained with Gill-III hematoxylin (Merck), dehydrated and mounted with VectaMount permanent mounting medium (Vector Laboratories). The sections were analyzed using a DM6000 B microscope (Leica).

#### ***In situ* hybridization**

*In situ* hybridization with radioactively  $S^{35}$ -labeled *in vitro* transcribed RNA hybridization probes was performed as previously described (1, 6, 7). For generation of transcription plasmids a 676 bp cDNA fragment of the SPARCL1 sequence (NM\_004684.5, bp 1841-2516) was inserted either in antisense and sense orientation in the pcDNA4/Myc-His B vector (Life Technologies). The patient characteristics as analyzed by immunohistochemical staining are detailed in Supplementary Table 7.

#### **Quantification of cyto- and histochemical stainings**

Microvessel density was quantified after CD31 immunohistochemical staining following standard protocols (8). In brief, for each tissue section/patient the vascular hot spot was determined and in these hot spots three optical fields (magnification 20x) were counted. Subsequently, average microvessel densities and standard deviations were calculated.

Vessel perimeter/area quantification was performed in ten vessels per patient (for patient characteristics see Supplementary Table 7, n=9 per group; n=270 total vessels) or mouse (n=21 mice [n=11 wild type, n=10 Sc1-/-] with n=10 vessels each; n=210 total vessels) with continuous CD31 expression and an obvious lumen. In the normal human colon, vessels located in the submucosa were quantified. The perimeters were determined with the analysis tool of the LAS-X software (Leica). Statistical differences were determined using unpaired student's t-test.

Relative SPARCL1 expression per vessel (SPARCL1 mosaic vessels) was determined by estimating the relative numbers of SPARCL1-expressing ECs compared to the total number of ECs constituting the respective vessel. The relative expression was categorized in four groups: 0-25%, 25-50%, 50-75%, 75-100%. All results were controlled by two independent investigators and discrepancies were discussed to obtain consent. The statistical significance of the relative distribution of SPARCL1 expression between the groups was determined by chi-square test.

The amount of  $\alpha$ -SMA coverage per vessel was categorized in three groups: negative/weak, moderate and high. The statistical significance of the relative distribution of  $\alpha$ -SMA coverage between the groups was determined by chi-square test.

The quantification of nuclear IL-33 and Ki-67 in all cell cultures was performed by counting the number of total nuclei as compared to nuclear IL-33-positive and Ki-67 positive cells with the LAS-AF software (Leica). Five pictures were acquired for each condition at a 20x magnification with approximately 100 nuclei per optical field. Results are given as ratio of nuclear IL-33/Ki67 positive nuclei per total nuclei per optical field.

The relative amount of proliferating cells in EC transiently transfected with SPARCL1 was determined by quantifying the relative percentage of EdU-positive cells in SPARCL1-positive compared to SPARCL1-negative cells using LAS X software (Leica). Pictures were acquired at a 20x magnification with approximately 100 nuclei per optical field and 13 pictures were evaluated. Results are given as ratio of EdU-positive cells per total SPARCL1-positive or SPARCL1-negative cells per optical field.

**Supplemental Table 1. Clinical characteristics of the colorectal carcinoma patients included in the tumor endothelial cell isolation procedure for transcriptome analysis.** The patients were differentiated using GBP-1 expression and were not different regarding their major clinical characteristics. UICC stage, localization of the tumor, neoadjuvant radio- or chemotherapy, grading, T-, N-, M-categories, L-, V-, R-classification, age and, sex are given for each patient. Chi square test and Mann-Whitney-U-test were used to analyze statistical differences (n.s.=not significant).

| Pat            | GBP-1 tissue | UICC stage  | Localization       | Neoadjuvant radio- or chemotherapy | Grading     | T           | N           | M           | L           | V           | R           | Age         | Sex         |
|----------------|--------------|-------------|--------------------|------------------------------------|-------------|-------------|-------------|-------------|-------------|-------------|-------------|-------------|-------------|
| 1              | +            | III         | rectum             | none                               | 2           | 3           | 1           | 0           | 0           | 0           | 0           | 76          | f           |
| 2              | +            | III         | rectum             | none                               | 2           | 3           | 1           | 0           | 1           | 0           | 0           | 60          | f           |
| 3              | +            | IV          | ascending colon    | none                               | 3           | 3           | 2           | 1           | 1           | 1           | 2           | 23          | f           |
| 4              | +            | II          | sigmoid colon      | none                               | 3           | 4           | 0           | 0           | 0           | 1           | 0           | 65          | m           |
| 5              | +            | II          | transverse colon   | none                               | 2           | 3           | 0           | 0           | 0           | 0           | 0           | 61          | m           |
| 6              | +            | I           | rectum             | none                               | 2           | 2           | 0           | 0           | 0           | 0           | 0           | 49          | f           |
| 7              | +            | I           | transverse colon   | none                               | 2           | 2           | 0           | 0           | 0           | 0           | 0           | 70          | f           |
| 8              | +            | II          | colon left flexure | none                               | 2           | 3           | 0           | 0           | 0           | 0           | 0           | 73          | f           |
| 9              | -            | I           | rectum             | none                               | 2           | 2           | 0           | 0           | 0           | 0           | 0           | 66          | f           |
| 10             | -            | III         | ascending colon    | none                               | 2           | 3           | 2           | 0           | 1           | 0           | 0           | 73          | f           |
| 11             | -            | IV          | ascending colon    | none                               | 2           | 3           | 2           | 1           | 1           | 0           | 2           | 70          | f           |
| 12             | -            | I           | rectum             | none                               | 2           | 2           | 0           | 0           | 0           | 0           | 0           | 56          | m           |
| 13             | -            | II          | sigmoid colon      | none                               | 2           | 3           | 0           | 0           | 0           | 0           | 0           | 57          | f           |
| 14             | -            | III         | transverse colon   | none                               | 3           | 4           | 2           | 0           | 0           | 0           | 0           | 53          | f           |
| 15             | -            | II          | rectum             | none                               | 2           | 3           | 0           | 0           | 0           | 0           | 0           | 44          | m           |
| 16             | -            | I           | rectum             | none                               | 1           | 2           | 0           | 0           | 0           | 0           | 0           | 68          | f           |
| <b>p-value</b> |              | <b>n.s.</b> |                    | <b>n.s.</b>                        | <b>n.s.</b> | <b>n.s.</b> | <b>n.s.</b> | <b>n.s.</b> | <b>n.s.</b> | <b>n.s.</b> | <b>n.s.</b> | <b>n.s.</b> | <b>n.s.</b> |

**Supplemental Table 2. TECs isolated from human colorectal carcinoma show an endothelial cell phenotype.** Expression levels of cell type-specific genes in tumor endothelial cells (TECs) and control cells (human umbilical vein endothelial cells [HUVEC], colorectal carcinoma cells [DLD-1], primary smooth muscle cells [SMC], primary dermal fibroblasts, monocytes [THP-1] and T-cells [Jurkat]) were determined using specific primer/probe sets with RT-qPCR using 10 ng total RNA. Results are given as mean values in  $40-\Delta Ct$ . The measurements were performed in triplicates. n.d. = not detectable.

|                    | <b>CD31</b> | <b>vWF</b> | <b>CD105</b> | <b>VE-cadherin</b> | <b>CK-20</b> | <b>CD45</b> | <b>Desmin</b> |
|--------------------|-------------|------------|--------------|--------------------|--------------|-------------|---------------|
| <b>TECs (n=7)</b>  | 37.59       | 35.52      | 33.11        | 36.42              | n.d.         | n.d.        | n.d.          |
| <b>HUVEC</b>       | 39.09       | 38.12      | 35.92        | 37.49              | n.d.         | n.d.        | n.d.          |
| <b>DLD-1</b>       | n.d.        | n.d.       | n.d.         | n.d.               | 24.76        | n.d.        | 19.47         |
| <b>SMC</b>         | n.d.        | n.d.       | 34.56        | 32.15              | n.d.         | n.d.        | 20.01         |
| <b>Fibroblasts</b> | n.d.        | n.d.       | 34.14        | n.d.               | n.d.         | n.d.        | 30.08         |
| <b>THP-1</b>       | 35.91       | n.d.       | 32.23        | n.d.               | n.d.         | 34.72       | 24.43         |
| <b>Jurkat</b>      | 33.22       | n.d.       | n.d.         | n.d.               | n.d.         | 33.48       | n.d.          |



**Supplemental Table 3. Sensitivity analysis of the RT-qPCR approach for the detection of cross-contaminating cell types in endothelial cells.** HUVEC were mixed with other cell types (indicated) in the relative amounts as given below after automated cell count (final total amount of cells  $3 \times 10^4$ ) directly before cell harvesting. RNA was extracted and subjected to RT-qPCR analysis. Pure HUVEC (first lane) were used as a control. The limits of detection for each cell type (2% DLD, 1% NHDF, 1% SMC, 0.1% Jurkat, 0.5% THP-1) are shaded in grey. The indicated values are the mean values given as  $40 - \Delta Ct$ . Abbreviations: human umbilical vein endothelial cells, HUVEC; human colorectal carcinoma cell line, DLD-1; primary normal human dermal fibroblasts, NHDF; primary smooth muscle cells, SMC; T-cell line, Jurkat; monocytic cell line, THP-1. n.d.= not detectable.

| Sample      | CD31  | CD45  | Desmin | CK20  |
|-------------|-------|-------|--------|-------|
| HUVEC       | 37.21 | n.d.  | n.d.   | n.d.  |
| 5% DLD-1    | 37.10 |       |        | 19.03 |
| 3% DLD-1    | 37.21 |       |        | 18.88 |
| 2% DLD-1    | 37.10 |       |        | 19.28 |
| 1% DLD-1    | 37.34 |       |        | n.d.  |
| 0.5% DLD-1  | 36.13 |       |        | n.d.  |
| 0.1% DLD-1  | 37.19 |       |        | n.d.  |
| 1% NHDF     | 36.99 |       | 20.94  |       |
| 0.5% NHDF   | 37.12 |       | n.d.   |       |
| 0.1% NHDF   | 36.85 |       | n.d.   |       |
| 3% SMC      | 36.99 |       | 19.00  |       |
| 2% SMC      | 37.40 |       | 20.75  |       |
| 1% SMC      | 37.43 |       | 20.03  |       |
| 0.5% SMC    | 37.08 |       | n.d.   |       |
| 0.1% SMC    | 37.01 |       | n.d.   |       |
| 1% Jurkat   | 37.18 | 25.15 |        |       |
| 0.5% Jurkat | 37.51 | 24.13 |        |       |
| 0.1% Jurkat | 36.99 | 21.37 |        |       |
| 1% THP-1    | 37.37 | 22.07 |        |       |
| 0.5% THP-1  | 36.93 | 20.78 |        |       |
| 0.1% THP-1  | 37.02 | n.d.  |        |       |

**Supplemental Table 4. Top 50 features identified by gene set enrichment analysis (GSEA) after transcriptome analysis of tumor endothelial cells isolated from GBP-1<sup>high</sup> compared to GBP-1<sup>low</sup> colorectal carcinomas.**

| Name              | Gene title                                                                                  | Score  |
|-------------------|---------------------------------------------------------------------------------------------|--------|
| GALK1             | galactokinase 1                                                                             | 1.439  |
| ATN1              | atrophin 1                                                                                  | 1.361  |
| LOC647323         | -                                                                                           | 1.357  |
| CALR              | calreticulin                                                                                | 1.287  |
| TUBB2A /// TUBB2B | null                                                                                        | 1.237  |
| RAB11B            | RAB11B, member RAS oncogene family                                                          | 1.180  |
| FGF12             | fibroblast growth factor 12                                                                 | 1.162  |
| PPARGC1B          | peroxisome proliferative activated receptor, gamma, coactivator 1, beta                     | 1.138  |
| TLN1              | talin 1                                                                                     | 1.135  |
| LOC643287         | -                                                                                           | 1.119  |
| DCAMKL3           | doublecortin and CaM kinase-like 3                                                          | 1.108  |
| USHBP1            | Usher syndrome 1C binding protein 1                                                         | 1.092  |
| LOC196463         | -                                                                                           | 1.084  |
| PRKAG2            | protein kinase, AMP-activated, gamma 2 non-catalytic subunit                                | 1.082  |
| VAMP2             | vesicle-associated membrane protein 2 (synaptobrevin 2)                                     | 1.079  |
| LOC339788         | -                                                                                           | 1.077  |
| RASGEF1B          | RasGEF domain family, member 1B                                                             | 1.069  |
| SLC9A3R2          | solute carrier family 9 (sodium/hydrogen exchanger), member 3 regulator 2                   | 1.066  |
| PPM1G             | protein phosphatase 1G (formerly 2C), magnesium-dependent, gamma isoform                    | 1.062  |
| ACR               | acrosin                                                                                     | 1.056  |
| SORBS3            | sorbin and SH3 domain containing 3                                                          | 1.054  |
| RAP2A /// RAP2B   | null                                                                                        | 1.047  |
| SREBF2            | sterol regulatory element binding transcription factor 2                                    | 1.036  |
| C10ORF55          | chromosome 10 open reading frame 55                                                         | 1.022  |
| LOC399884         | -                                                                                           | 1.021  |
| PGR               | progesterone receptor                                                                       | 1.021  |
| RAB5C             | RAB5C, member RAS oncogene family                                                           | 1.020  |
| ATXN2L            | ataxin 2-like                                                                               | 1.016  |
| LOC284912         | -                                                                                           | 1.009  |
| PKN1              | protein kinase N1                                                                           | 1.004  |
| FLJ44894          | -                                                                                           | 0.996  |
| EYA3              | eyes absent homolog 3 (Drosophila)                                                          | 0.996  |
| TPMT              | thiopurine S-methyltransferase                                                              | 0.996  |
| LASS4             | LAG1 homolog, ceramide synthase 4 (S. cerevisiae)                                           | 0.996  |
| BAHD1             | bromo adjacent homology domain containing 1                                                 | 0.986  |
| VEGFB             | vascular endothelial growth factor B                                                        | 0.982  |
| FHOD1             | formin homology 2 domain containing 1                                                       | 0.975  |
| TPM3 /// TPM4     | null                                                                                        | 0.974  |
| YWHAE             | tyrosine 3-monooxygenase/tryptophan 5-monooxygenase activation protein, epsilon polypeptide | 0.967  |
| IL3RA             | interleukin 3 receptor, alpha (low affinity)                                                | 0.964  |
| FAM120C           | family with sequence similarity 120C                                                        | 0.963  |
| ZBTB40            | zinc finger and BTB domain containing 40                                                    | 0.962  |
| STRN              | striatin, calmodulin binding protein                                                        | 0.962  |
| C6ORF106          | chromosome 6 open reading frame 106                                                         | 0.955  |
| TRIM65            | tripartite motif-containing 65                                                              | 0.952  |
| SR-A1             | -                                                                                           | 0.949  |
| LATS1             | LATS, large tumor suppressor, homolog 1 (Drosophila)                                        | 0.948  |
| C11ORF42          | chromosome 11 open reading frame 42                                                         | 0.944  |
| FASN              | fatty acid synthase                                                                         | 0.943  |
| LOC202347         | -                                                                                           | 0.939  |
| LOC474170         | -                                                                                           | -0.903 |
| USH3A             | Usher syndrome 3A                                                                           | -0.904 |
| GNRH2             | gonadotropin-releasing hormone 2                                                            | -0.905 |
| ALPP /// ALPPL2   | null                                                                                        | -0.905 |
| SERPINA6          | serpin peptidase inhibitor, clade A (alpha-1 antiproteinase, antitrypsin), member 6         | -0.910 |
| CDC2L5            | cell division cycle 2-like 5 (cholinesterase-related cell division controller)              | -0.910 |
| FLJ30092          | -                                                                                           | -0.921 |
| AP1S1             | adaptor-related protein complex 1, sigma 1 subunit                                          | -0.921 |

|                      |                                                                                 |        |
|----------------------|---------------------------------------------------------------------------------|--------|
| ZNF777               | zinc finger protein 777                                                         | -0.922 |
| LOC642775            | null                                                                            | -0.927 |
| FLJ31438             | -                                                                               | -0.928 |
| TMEM10               | transmembrane protein 10                                                        | -0.932 |
| HYMAI                | hydatidiform mole associated and imprinted                                      | -0.935 |
| ATM                  | ataxia telangiectasia mutated (includes complementation groups A, C and D)      | -0.936 |
| NFE2                 | nuclear factor (erythroid-derived 2), 45kDa                                     | -0.936 |
| SLC5A2               | solute carrier family 5 (sodium/glucose cotransporter), member 2                | -0.940 |
| FBXW12               | F-box and WD-40 domain protein 12                                               | -0.940 |
| FLJ37538             | -                                                                               | -0.944 |
| MAFF                 | v-maf musculoaponeurotic fibrosarcoma oncogene homolog F (avian)                | -0.949 |
| FLJ22795             | -                                                                               | -0.953 |
| DNAI1                | dynein, axonemal, intermediate chain 1                                          | -0.954 |
| STAT4                | signal transducer and activator of transcription 4                              | -0.962 |
| OPRD1                | opioid receptor, delta 1                                                        | -0.962 |
| TMEM163              | transmembrane protein 163                                                       | -0.966 |
| DST                  | dystonin                                                                        | -0.972 |
| MGC3032              | -                                                                               | -0.972 |
| PHOX2B               | paired-like homeobox 2b                                                         | -0.974 |
| PRKXP1               | protein kinase, X-linked, pseudogene 1                                          | -0.983 |
| FLJ34306             | -                                                                               | -0.987 |
| C1ORF53              | chromosome 1 open reading frame 53                                              | -0.993 |
| LOC165186            | -                                                                               | -1.004 |
| AATK                 | apoptosis-associated tyrosine kinase                                            | -1.004 |
| TBC1D3 /// TBC1D3C / | null                                                                            | -1.043 |
| HMP19                | -                                                                               | -1.056 |
| LOC150527            | -                                                                               | -1.073 |
| WNT9A                | wingless-type MMTV integration site family, member 9A                           | -1.078 |
| FLJ30307             | -                                                                               | -1.086 |
| C21ORF104            | chromosome 21 open reading frame 104                                            | -1.096 |
| LOC644541 /// LOC649 | null                                                                            | -1.097 |
| CNIH2                | cornichon homolog 2 (Drosophila)                                                | -1.099 |
| ALF                  | -                                                                               | -1.121 |
| EPHB3                | EPH receptor B3                                                                 | -1.146 |
| C9ORF152             | chromosome 9 open reading frame 152                                             | -1.151 |
| C9ORF64              | chromosome 9 open reading frame 64                                              | -1.170 |
| PRSS16               | protease, serine, 16 (thymus)                                                   | -1.178 |
| C12ORF50             | chromosome 12 open reading frame 50                                             | -1.250 |
| SLC6A12              | solute carrier family 6 (neurotransmitter transporter, betaine/GABA), member 12 | -1.287 |
| KCNJ10               | potassium inwardly-rectifying channel, subfamily J, member 10                   | -1.402 |
| TRIM46               | tripartite motif-containing 46                                                  | -1.454 |
| MGC50811             | -                                                                               | -1.612 |

**Supplemental Table 5. Gene sets enriched between tumor endothelial cells isolated from GBP-1<sup>high</sup> and GBP-1<sup>low</sup> colorectal carcinomas as identified by GSEA. Enriched gene sets were analyzed for all 7 major collections deposited in the molecular signatures database v4.0. Enriched gene sets are given if FDR <25% or NOM p-val <0.01. Abbreviations: false discovery rate (FDR), nominal p-value (NOM p-val), enrichment score (ES), normalized enrichment score (NES), familywise-error rate (FWER).**

|                                    | Enriched gene sets (FDR<25%) | Enriched gene sets (NOM p-val<0.01) | NAME                                                                                                                                                                                                                                                                                                                                                                                                                                                                                                                                                                                                          | SIZE                                                                                                      | ES                                                                                                                                                                 | NES                                                                                                                                                                | NOM p-val                                                                                                                                                                                          | FDR q-val                                                                                                                                                                                 | FWER p-val                                                                                                                                                     | RANK AT MAX                                                                                                                                 | LEADING EDGE                                                                                                                                                                                                                                                                                                                                                                                                                                                                                                                                                                                                                  |
|------------------------------------|------------------------------|-------------------------------------|---------------------------------------------------------------------------------------------------------------------------------------------------------------------------------------------------------------------------------------------------------------------------------------------------------------------------------------------------------------------------------------------------------------------------------------------------------------------------------------------------------------------------------------------------------------------------------------------------------------|-----------------------------------------------------------------------------------------------------------|--------------------------------------------------------------------------------------------------------------------------------------------------------------------|--------------------------------------------------------------------------------------------------------------------------------------------------------------------|----------------------------------------------------------------------------------------------------------------------------------------------------------------------------------------------------|-------------------------------------------------------------------------------------------------------------------------------------------------------------------------------------------|----------------------------------------------------------------------------------------------------------------------------------------------------------------|---------------------------------------------------------------------------------------------------------------------------------------------|-------------------------------------------------------------------------------------------------------------------------------------------------------------------------------------------------------------------------------------------------------------------------------------------------------------------------------------------------------------------------------------------------------------------------------------------------------------------------------------------------------------------------------------------------------------------------------------------------------------------------------|
| <b>c1: positional gene sets</b>    | 0 (positive)<br>0 (negative) | 0 (positive)<br>0 (negative)        | -                                                                                                                                                                                                                                                                                                                                                                                                                                                                                                                                                                                                             |                                                                                                           |                                                                                                                                                                    |                                                                                                                                                                    |                                                                                                                                                                                                    |                                                                                                                                                                                           |                                                                                                                                                                |                                                                                                                                             |                                                                                                                                                                                                                                                                                                                                                                                                                                                                                                                                                                                                                               |
| <b>c2: curated gene sets</b>       | 0 (positive)                 | 14 (positive)                       | CREIGHTON_AKT1_SIGNALING_VIA_MTOR_UP<br>BIOCARTA_IL3_PATHWAY<br>HWANG_PROSTATE_CANCER_MARKERS<br>BIOCARTA_CHREBP2_PATHWAY<br>CAIRO_PML_TARGETS_BOUND_BY_MYC_UP<br>HONRADO_BREAST_CANCER_BRCA1_VS_BRCA2<br>VIETOR_IFRD1_TARGETS<br>PID_SIP3_PATHWAY<br>TIMOFEEVA_GROWTH_STRESS_VIA_STAT1_DN<br>BIOCARTA_HER2_PATHWAY<br>SIG_PIP3_SIGNALING_IN_B_LYMPHOCYTES<br>CUI_GLUCOSE_DEPRIVATION<br>BIOCARTA_ECM_PATHWAY<br>REACTOME_DOWNSTREAM_SIGNAL_TRANSDUCTION<br>SU_PANCREAS<br>REACTOME_SIGNALING_BY_BMP<br>TIEN_INTESTINE_PROBIOTICS_6HR_DN<br>REACTOME_DOWNREGULATION_OF_SMAD2_3_SMAD4_TRANSCRIPTIONAL_ACTIVITY | 32<br>15<br>26<br>42<br>23<br>18<br>19<br>25<br>15<br>22<br>34<br>57<br>23<br>84<br>47<br>21<br>141<br>17 | 0.560<br>0.658<br>0.576<br>0.547<br>0.678<br>0.657<br>0.677<br>0.568<br>0.597<br>0.469<br>0.457<br>0.379<br>0.615<br>0.361<br>-0.442<br>-0.551<br>-0.341<br>-0.448 | 1.943<br>1.818<br>1.842<br>1.958<br>1.862<br>1.800<br>1.771<br>1.775<br>1.671<br>1.681<br>1.581<br>1.504<br>1.775<br>1.560<br>-1.585<br>-1.639<br>-1.566<br>-1.693 | 0.000<br>0.000<br>0.002<br>0.002<br>0.002<br>0.004<br>0.006<br>0.008<br>0.008<br>0.008<br>0.010<br>0.010<br>0.010<br>0.010<br>0.010<br>0.002<br>0.004<br>0.004<br>0.004<br>0.004<br>0.004<br>0.004 | 0.490<br>0.954<br>0.902<br>0.794<br>0.940<br>0.985<br>0.883<br>1.000<br>1.000<br>1.000<br>0.787<br>1.000<br>1.000<br>0.954<br>1.000<br>1.000<br>1.000<br>1.000<br>1.000<br>1.000<br>1.000 | 0.272<br>0.718<br>0.625<br>0.240<br>0.552<br>0.788<br>0.860<br>0.848<br>0.978<br>0.976<br>1.000<br>1.000<br>0.849<br>1.000<br>0.999<br>0.994<br>0.999<br>0.974 | 2527<br>3088<br>2296<br>3218<br>3581<br>1929<br>3943<br>4133<br>2091<br>3088<br>2859<br>1592<br>4099<br>3826<br>5234<br>3897<br>6046<br>976 | tags=31%, list=12%, signal=36%<br>tags=53%, list=15%, signal=63%<br>tags=31%, list=11%, signal=35%<br>tags=40%, list=16%, signal=48%<br>tags=52%, list=17%, signal=63%<br>tags=56%, list=9%, signal=61%<br>tags=58%, list=19%, signal=72%<br>tags=56%, list=20%, signal=70%<br>tags=47%, list=10%, signal=52%<br>tags=27%, list=15%, signal=32%<br>tags=32%, list=14%, signal=38%<br>tags=19%, list=8%, signal=21%<br>tags=48%, list=20%, signal=60%<br>tags=35%, list=19%, signal=42%<br>tags=43%, list=25%, signal=57%<br>tags=48%, list=19%, signal=59%<br>tags=43%, list=29%, signal=61%<br>tags=24%, list=5%, signal=25% |
| <b>c3: motif gene sets</b>         | 0 (positive)<br>0 (negative) | 0 (positive)<br>4 (negative)        | VSNFAT_Q4_Q1<br>ACATA1C,MIR-190<br>GTTAAAG,MIR-302B<br>TACTTGA,MIR-26A,MIR-26B                                                                                                                                                                                                                                                                                                                                                                                                                                                                                                                                | 234<br>52<br>56<br>262                                                                                    | -0.302<br>-0.430<br>-0.428<br>-0.387                                                                                                                               | -1.429<br>-1.677<br>-1.657<br>-1.628                                                                                                                               | 0.002<br>0.006<br>0.006<br>0.008                                                                                                                                                                   | 1.000<br>1.000<br>0.674<br>0.568                                                                                                                                                          | 0.948<br>0.371<br>0.426<br>0.498                                                                                                                               | 3087<br>3015<br>3888<br>4441                                                                                                                | tags=23%, list=15%, signal=27%<br>tags=31%, list=15%, signal=36%<br>tags=34%, list=19%, signal=42%<br>tags=35%, list=22%, signal=44%                                                                                                                                                                                                                                                                                                                                                                                                                                                                                          |
| <b>c4: computational gene sets</b> | 0 (positive)<br>0 (negative) | 0 (positive)<br>3 (negative)        | MODULE_237<br>GCM_ZNF198<br>GCM_RAB10                                                                                                                                                                                                                                                                                                                                                                                                                                                                                                                                                                         | 49<br>97<br>142                                                                                           | -0.417<br>-0.361<br>-0.409                                                                                                                                         | -1.636<br>-1.701<br>-1.829                                                                                                                                         | 0.004<br>0.004<br>0.006                                                                                                                                                                            | 0.828<br>1.000<br>1.000                                                                                                                                                                   | 0.819<br>0.656<br>0.303                                                                                                                                        | 2477<br>5613<br>6437                                                                                                                        | tags=27%, list=12%, signal=30%<br>tags=40%, list=27%, signal=55%<br>tags=51%, list=31%, signal=73%                                                                                                                                                                                                                                                                                                                                                                                                                                                                                                                            |
| <b>c5: GO gene sets</b>            | 1 (positive)                 | 3 (positive)                        | HYDROLASE_ACTIVITY_ACTING_ON_CARBON_NITROGEN_NOT_PEPTIDEBONDSIN_LINEAR_AMIDES<br>GENERAL_RNA_POLYMERASE_II_TRANSCRIPTION_FACTOR_ACTIVITY<br>HYDROLASE_ACTIVITY_ACTING_ON_CARBON_NITROGEN_                                                                                                                                                                                                                                                                                                                                                                                                                     | 19<br>24<br>19                                                                                            | 0.616<br>0.492<br>0.616                                                                                                                                            | 1.936<br>1.813<br>1.936                                                                                                                                            | 0.004<br>0.000<br>0.004                                                                                                                                                                            | 0.206<br>0.555<br>0.206                                                                                                                                                                   | 0.098<br>0.351<br>0.098                                                                                                                                        | 247<br>1290<br>247                                                                                                                          | tags=21%, list=1%, signal=21%<br>tags=21%, list=6%, signal=22%<br>tags=21%, list=1%, signal=21%                                                                                                                                                                                                                                                                                                                                                                                                                                                                                                                               |



**Supplemental Table 6. Top 50 up- and top 50 downregulated target genes in tumor endothelial cells isolated from GBP-1<sup>high</sup> versus GBP-1<sup>low</sup> colorectal carcinoma as identified by significance analysis of microarray (SAM).** Top 50 up- and downregulated target genes identified by SAM with fold change >2-fold. Redundant genes with different probe set IDs are shaded in grey. False discovery rate (FDR, q-value %), Probe set IDs (Affymetrix) and RefSeq protein and transcript IDs are given for each of the identified targets. If multiple protein or transcript IDs were annotated the first is listed.

| Fold-induction | FDR (q-value %) | Gene Symbol | Gene Title                                                                                    | Probe Set ID | RefSeq Protein ID | RefSeq Transcript ID |
|----------------|-----------------|-------------|-----------------------------------------------------------------------------------------------|--------------|-------------------|----------------------|
| 34.038         | 12.17           | SPARCL1     | SPARC-like 1 (hevin)                                                                          | 200795_at    | NP_001121782      | NM_001128310         |
| 7.889          | 0.00            | PPP1R14A    | protein phosphatase 1, regulatory (inhibitor) subunit 14A                                     | 227006_at    | NP_001230876      | NM_001243947         |
| 7.486          | 2.49            | SEPT9       | septin 9                                                                                      | 207425_s_at  | NP_001106963      | NM_001113491         |
| 5.924          | 5.81            | GPAT2       | glycerol-3-phosphate acyltransferase 2, mitochondrial                                         | 235557_at    | NP_997211         | NM_207328            |
| 5.570          | 3.89            | SLC9A3R2    | solute carrier family 9, subfamily A (NHE3, cation proton antiporter 3), member 3 regulator 2 | 209830_s_at  | NP_001123484      | NM_001130012         |
| 5.292          | 7.24            | NEURL1B     | neuralized homolog 1B (Drosophila)                                                            | 225355_at    | NP_001136123      | NM_001142651         |
| 5.248          | 2.63            | CALR        | calreticulin                                                                                  | 214315_x_at  | NP_004334         | NM_004343            |
| 4.415          | 4.68            | ACE         | angiotensin I converting enzyme (peptidyl-dipeptidase A) 1                                    | 209749_s_at  | NP_000780         | NM_000789            |
| 4.115          | 5.81            | INF2        | inverted formin, FH2 and WH2 domain containing                                                | 222534_s_at  | NP_001026884      | NM_001031714         |
| 4.111          | 16.54           | MYRIP       | myosin VIIA and Rab interacting protein                                                       | 214156_at    | NP_056275         | NM_015460            |
| 4.031          | 4.68            | FAM65A      | family with sequence similarity 65, member A                                                  | 230806_s_at  | NP_001180451      | NM_001193522         |
| 3.942          | 2.63            | KAT6A/MYST3 | K(lysine) acetyltransferase 6A/MYST3                                                          | 216361_s_at  | NP_001092882      | NM_001099412         |
| 3.875          | 0.00            | ATN1        | atrophin 1                                                                                    | 40489_at     | NP_001007027      | NM_001007026         |
| 3.851          | 0.00            | MAZ         | MYC-associated zinc finger protein (purine-binding transcription factor)                      | 207824_s_at  | NP_001036004      | NM_001042539         |
| 3.830          | 7.90            | MEOX2       | mesenchyme homeobox 2                                                                         | 206201_s_at  | NP_005915         | NM_005924            |
| 3.797          | 2.63            | CALR        | calreticulin                                                                                  | 212953_x_at  | NP_004334         | NM_004343            |
| 3.690          | 2.63            | ADAMTS9     | ADAM metalloproteinase with thrombospondin type 1 motif, 9                                    | 1554697_at   | NP_891550         | NM_182920            |
| 3.639          | 2.63            | DYRK1A      | dual-specificity tyrosine-(Y)-phosphorylation regulated kinase 1A                             | 211079_s_at  | NP_001387         | NM_001396            |
| 3.594          | 4.52            | CNOT6L      | CCR4-NOT transcription complex, subunit 6-like                                                | 1553267_a_at | NP_653172         | NM_144571            |
| 3.570          | 17.73           | TCF3        | Transcription factor 3 (E2A immunoglobulin enhancer binding factors E12/E47)                  | 202648_at    | NP_001129611      | NM_001136139         |
| 3.567          | 0.00            | ATN1        | atrophin 1                                                                                    | 208871_at    | NP_001007027      | NM_001007026         |
| 3.535          | 2.63            | ARHGDI2     | Rho GDP dissociation inhibitor (GDI) alpha                                                    | 213606_s_at  | NP_001172006      | NM_001185077         |
| 3.396          | 2.63            | CAMK2N1     | calcium/calmodulin-dependent protein kinase II inhibitor 1                                    | 228302_x_at  | NP_061054         | NM_018584            |
| 3.393          | 7.90            | SCD         | stearoyl-CoA desaturase (delta-9-desaturase)                                                  | 211708_s_at  | NP_005054         | NM_005063            |
| 3.365          | 5.81            | ---         | ---                                                                                           | 217027_x_at  | ---               | ---                  |
| 3.361          | 5.81            | FILIP1      | filamin A interacting protein 1                                                               | 1570515_a_at | NP_056502         | NM_015687            |
| 3.350          | 14.16           | ---         | ---                                                                                           | 241617_x_at  | ---               | ---                  |
| 3.334          | 2.63            | ARHGDI2     | Rho GDP dissociation inhibitor (GDI) alpha                                                    | 201167_x_at  | NP_001172006      | NM_001185077         |
| 3.310          | 10.22           | SLC30A3     | solute carrier family 30 (zinc transporter), member 3                                         | 207035_at    | NP_003450         | NM_003459            |
| 3.290          | 5.81            | RPL14       | ribosomal protein L14                                                                         | 219138_at    | NP_001030168      | NM_001034996         |
| 3.279          | 5.19            | GPR56       | G protein-coupled receptor 56                                                                 | 206582_s_at  | NP_001139242      | NM_001145770         |
| 3.212          | 0.00            | CALR        | calreticulin                                                                                  | 200935_at    | NP_004334         | NM_004343            |
| 3.211          | 11.04           | SCD         | stearoyl-CoA desaturase (delta-9-desaturase)                                                  | 211162_x_at  | NP_005054         | NM_005063            |
| 3.176          | 17.73           | DPP4        | dipeptidyl-peptidase 4                                                                        | 211478_s_at  | NP_001926         | NM_001935            |

|        |       |           |                                                                   |              |              |              |
|--------|-------|-----------|-------------------------------------------------------------------|--------------|--------------|--------------|
| 3.149  | 4.52  | DUSP7     | dual specificity phosphatase 7                                    | 214793_at    | NP_001938    | NM_001947    |
| 3.130  | 13.03 | WASF2     | WAS protein family, member 2                                      | 224563_at    | NP_001188333 | NM_001201404 |
| 3.125  | 5.19  | PDE7B     | phosphodiesterase 7B                                              | 243438_at    | NP_061818    | NM_018945    |
| 3.113  | 4.52  | ANXA1     | Annexin A1                                                        | 233011_at    | NP_000691    | NM_000700    |
| 3.100  | 4.52  | ZFP36L2   | zinc finger protein 36, C3H type-like 2                           | 201367_s_at  | NP_008818    | NM_006887    |
| 3.082  | 0.00  | FGF12     | fibroblast growth factor 12                                       | 207501_s_at  | NP_004104    | NM_004113    |
| 3.055  | 4.68  | CTSH      | cathepsin H                                                       | 202295_s_at  | NP_004381    | NM_004390    |
| 3.047  | 4.68  | FAM189B   | family with sequence similarity 189, member B                     | 1555515_a_at | NP_001254537 | NM_001267608 |
| 2.946  | 2.63  | GSTT2     | glutathione S-transferase theta 2                                 | 205439_at    | NP_000845    | NM_000854    |
| 2.943  | 7.24  | FILIP1    | filamin A interacting protein 1                                   | 1556325_at   | NP_056502    | NM_015687    |
| 2.925  | 4.52  | DYRK1A    | dual-specificity tyrosine-(Y)-phosphorylation regulated kinase 1A | 211541_s_at  | NP_001387    | NM_001396    |
| 2.923  | 14.16 | MGP       | matrix Gla protein                                                | 238481_at    | NP_000891    | NM_000900    |
| 2.918  | 4.68  | PTPN23    | protein tyrosine phosphatase, non-receptor type 23                | 223149_s_at  | NP_056281    | NM_015466    |
| 2.911  | 5.81  | VEGFB     | vascular endothelial growth factor B                              | 203683_s_at  | NP_001230662 | NM_001243733 |
| 2.887  | 7.90  | AIF1L     | allograft inflammatory factor 1-like                              | 223075_s_at  | NP_001172024 | NM_001002260 |
| 2.873  | 10.22 | CYTH3     | cytohesin 3                                                       | 243752_s_at  | NP_004218    | NM_004227    |
| -2.294 | 12.17 | TMEM35    | transmembrane protein 35                                          | 219685_at    | NP_067650    | NM_021637    |
| -2.299 | 13.03 | ANGPTL4   | angiopoietin-like 4                                               | 221009_s_at  | NP_001034756 | NM_001039667 |
| -2.307 | 10.22 | ---       | ---                                                               | 1558605_at   | ---          | ---          |
| -2.311 | 15.63 | MAP9      | microtubule-associated protein 9                                  | 235550_at    | NP_001034669 | NM_001039580 |
| -2.332 | 16.54 | GATA6     | GATA binding protein 6                                            | 210002_at    | NP_005248    | NM_005257    |
| -2.332 | 14.16 | PRSS3     | protease, serine, 3                                               | 213421_x_at  | NP_001184026 | NM_001197097 |
| -2.341 | 8.70  | ---       | ---                                                               | 230820_at    | ---          | ---          |
| -2.346 | 19.02 | ADAM12    | ADAM metalloproteinase domain 12                                  | 226777_at    | NP_003465    | NM_003474    |
| -2.351 | 14.16 | PRSS3     | protease, serine, 3                                               | 207463_x_at  | NP_001184026 | NM_001197097 |
| -2.366 | 17.73 | ZFX4      | zinc finger homeobox 4                                            | 219779_at    | NP_078997    | NM_024721    |
| -2.372 | 10.22 | PSG7      | pregnancy specific beta-1-glycoprotein 7 (gene/pseudogene)        | 205602_x_at  | NP_001193579 | NM_001206650 |
| -2.377 | 11.04 | PSG1      | pregnancy specific beta-1-glycoprotein 1                          | 208257_x_at  | NP_001171754 | NM_001184825 |
| -2.378 | 14.16 | MAP9      | microtubule-associated protein 9                                  | 228423_at    | NP_001034669 | NM_001039580 |
| -2.390 | 13.03 | SUZ12P    | Suppressor of zeste 12 homolog pseudogene                         | 217704_x_at  | ---          | NR_024187    |
| -2.392 | 8.70  | PCDHB16   | protocadherin beta 16                                             | 232099_at    | NP_066008    | NM_020957    |
| -2.406 | 12.17 | LAMC2     | laminin, gamma 2                                                  | 207517_at    | NP_005553    | NM_005562    |
| -2.412 | 16.54 | IL8       | interleukin 8                                                     | 211506_s_at  | NP_000575    | NM_000584    |
| -2.417 | 9.42  | HINT3     | histidine triad nucleotide binding protein 3                      | 228697_at    | NP_612638    | NM_138571    |
| -2.432 | 12.17 | ---       | ---                                                               | 213747_at    | ---          | ---          |
| -2.457 | 10.22 | ---       | ---                                                               | 1560048_at   | ---          | ---          |
| -2.460 | 12.17 | TMEM163   | transmembrane protein 163                                         | 223503_at    | NP_112185    | NM_030923    |
| -2.486 | 19.02 | GSTT1     | glutathione S-transferase theta 1                                 | 203815_at    | NP_000844    | NM_000853    |
| -2.498 | 10.22 | CCDC122   | coiled-coil domain containing 122                                 | 1553894_at   | NP_659411    | NM_144974    |
| -2.507 | 13.03 | CDKN2A    | cyclin-dependent kinase inhibitor 2A                              | 207039_at    | NP_000068    | NM_000077    |
| -2.515 | 13.03 | GLIPR1    | GLI pathogenesis-related 1                                        | 204221_x_at  | NP_006842    | NM_006851    |
| -2.522 | 9.42  | EPG5      | Ectopic P-granules autophagy protein 5 homolog (C. elegans)       | 1563471_at   | NP_066015    | NM_020964    |
| -2.530 | 11.04 | VLDLR     | very low density lipoprotein receptor                             | 209822_s_at  | NP_001018066 | NM_001018056 |
| -2.539 | 14.16 | OAS1      | 2'-5'-oligoadenylate synthetase 1, 40/46kDa                       | 202869_at    | NP_001027581 | NM_001032409 |
| -2.576 | 13.03 | IL1A      | interleukin 1, alpha                                              | 210118_s_at  | NP_000566    | NM_000575    |
| -2.651 | 10.22 | PSG4      | pregnancy specific beta-1-glycoprotein 4                          | 208191_x_at  | NP_002771    | NM_002780    |
| -2.710 | 9.42  | ---       | ---                                                               | 237372_at    | ---          | ---          |
| -2.721 | 8.70  | UHRF1BP1L | UHRF1 binding protein 1-like                                      | 213120_at    | NP_001006948 | NM_001006947 |
| -2.743 | 8.70  | PCDHB14   | protocadherin beta 14                                             | 231726_at    | NP_061757    | NM_018934    |
| -2.815 | 9.42  | WDR78     | WD repeat domain 78                                               | 1554140_at   | NP_079039    | NM_024763    |

|        |       |              |                                                                  |             |              |              |
|--------|-------|--------------|------------------------------------------------------------------|-------------|--------------|--------------|
| -2.837 | 14.16 | DDX6         | DEAD (Asp-Glu-Ala-Asp) box helicase 6                            | 1562836_at  | NP_001244120 | NM_001257191 |
| -2.865 | 8.70  | ---          | ---                                                              | 232535_at   | ---          | ---          |
| -2.973 | 19.02 | PNMA2        | paraneoplastic Ma antigen 2                                      | 209598_at   | NP_009188    | NM_007257    |
| -3.023 | 15.63 | TTC29        | tetratricopeptide repeat domain 29                               | 223962_at   | NP_114162    | NM_031956    |
| -3.041 | 14.16 | EDIL3        | EGF-like repeats and discoidin I-like domains 3                  | 225275_at   | NP_005702    | NM_005711    |
| -3.068 | 19.02 | ADAM12       | ADAM metalloproteinase domain 12                                 | 202952_s_at | NP_003465    | NM_003474    |
| -3.087 | 13.03 | LPXN         | leupaxin                                                         | 216250_s_at | NP_001137467 | NM_001143995 |
| -3.254 | 10.22 | LOC100289026 | uncharacterized LOC100289026                                     | 237737_at   | ---          | XR_110942    |
| -3.336 | 15.63 | HEY2         | hairy/enhancer-of-split related with YRPW motif 2                | 219743_at   | NP_036391    | NM_012259    |
| -3.387 | 10.22 | LAMC2        | laminin, gamma 2                                                 | 202267_at   | NP_005553    | NM_005562    |
| -3.454 | 16.54 | GUCY1B3      | guanylate cyclase 1, soluble, beta 3                             | 203817_at   | NP_000848    | NM_000857    |
| -3.522 | 14.16 | ATP6V0D2     | ATPase, H+ transporting, lysosomal 38kDa, V0 subunit d2          | 1553153_at  | NP_689778    | NM_152565    |
| -4.267 | 15.63 | CCDC81       | coiled-coil domain containing 81                                 | 220389_at   | NP_001149946 | NM_001156474 |
| -4.449 | 19.02 | CYP1B1       | cytochrome P450, family 1, subfamily B, polypeptide 1            | 202436_s_at | NP_000095    | NM_000104    |
| -5.208 | 15.63 | CYP1B1       | cytochrome P450, family 1, subfamily B, polypeptide 1            | 202435_s_at | NP_000095    | NM_000104    |
| -5.609 | 9.42  | SERPIND1     | serpin peptidase inhibitor, clade D (heparin cofactor), member 1 | 205576_at   | NP_000176    | NM_000185    |



**Supplemental Table 7. Clinical characteristics of colorectal carcinoma patients subjected to immunohistochemical analysis of SPARCL1, CD31 and  $\alpha$ -SMA expression.** The patients were differentiated by GBP-1 expression. UICC stage, tumor, grading, age, and sex of both of the groups were closely matched and are given for each patient. Normal colon tissue was used from the same CRC patients in n=15 cases and was obtained at least 10 cm distant from the primary tumor. Normal colon from the cohort employed in Fig. 4C was used for n=5 patients due to small normal colon specimens from the corresponding CRC tissue. Chi square test and Mann-Whitney-U-test were used to analyze statistical differences (n.s.=not significant). This patient cohort was used in the stainings shown in Fig. 4A, 4B, 4D, 7 and, Supplementary Fig. 4 and 5.

| Patients | GBP-1 tissue | UICC stage | Grading | Age  | Sex  |
|----------|--------------|------------|---------|------|------|
| 1        | +            | III        | 3       | 70   | f    |
| 2        | +            | III        | 1       | 70   | m    |
| 3        | +            | IV         | 1       | 66   | f    |
| 4        | +            | III        | 3       | 64   | m    |
| 5        | +            | III        | 1       | 69   | m    |
| 6        | +            | I          | 1       | 75   | m    |
| 7        | +            | III        | 3       | 60   | m    |
| 8        | +            | III        | 2       | 23   | m    |
| 9        | +            | I          | 1       | 81   | m    |
| 10       | +            | I          | 1       | 59   | m    |
| 11       | +            | III        | 1       | 75   | m    |
| 12       | +            | III        | 3       | 75   | m    |
| 13       | -            | I          | 2       | 59   | m    |
| 14       | -            | I          | 1       | 64   | f    |
| 15       | -            | I          | 3       | 71   | m    |
| 16       | -            | II         | 3       | 57   | f    |
| 17       | -            | IV         | 1       | 57   | m    |
| 18       | -            | III        | 1       | 59   | m    |
| 19       | -            | IV         | 1       | 76   | f    |
| 20       | -            | III        | 3       | 78   | m    |
| 21       | -            | II         | 1       | 67   | m    |
| 22       | -            | IV         | 2       | 49   | f    |
| 23       | -            | I          | 2       | 74   | m    |
| 24       | -            | II         | 3       | 58   | m    |
| p-value  |              | n.s.       | n.s.    | n.s. | n.s. |

**Supplemental Table 8. Clinical characteristics of the colorectal carcinoma patients included in the analysis of the comparison of SPARCL1 expression in normal colon and CRC (Fig. 4C) and the correlation analysis SPARCL1 and GBP-1 expression in CRC (Fig. 4E). CRC patients (n=127 [correlation analysis, Fig. 4E] and thereof n=42 [normal/tumor comparison, Fig. 4C]) were matched according to UICC stage. Distributions of UICC stages, grading, age, and sex are given.**

| Characteristics                              | Correlation Analysis (n=127), Fig. 3E | %    | Normal/tumor comparison (n=42), Fig. 3C | %    |
|----------------------------------------------|---------------------------------------|------|-----------------------------------------|------|
| <b>Male:female ratio</b>                     | 74:53 = 1.39                          | NA   | 24:18 = 1.33                            | NA   |
| <b>Mean/range age (years)</b>                | 65.0/22-90                            | NA   | 63.0/22-81                              | NA   |
| <b>Pathological stage (UICC 2009)</b>        |                                       |      |                                         |      |
| I                                            | 33                                    | 26.0 | 11                                      | 26.2 |
| II                                           | 36                                    | 28.3 | 11                                      | 26.2 |
| III                                          | 30                                    | 23.6 | 8                                       | 19.0 |
| IV                                           | 28                                    | 22.0 | 12                                      | 28.6 |
| <b>Histopathological grading</b>             |                                       |      |                                         |      |
| Low grade (G <sub>1</sub> /G <sub>2</sub> )  | 86                                    | 67.7 | 28                                      | 66.7 |
| High grade (G <sub>3</sub> /G <sub>4</sub> ) | 41                                    | 32.3 | 14                                      | 33.3 |

NA, not applicable.

## Supplemental references

1. Schaal, U., Grenz, S., Merkel, S., Rau, T.T., Hadjihannas, M.V., Kremmer, E., Chudasama, P., Croner, R.S., Behrens, J., Stürzl, M., et al. 2013. Expression and localization of axin 2 in colorectal carcinoma and its clinical implication. *Int J Colorectal Dis*.
2. Wolf, M.J., Adili, A., Piotrowitz, K., Abdullah, Z., Boege, Y., Stemmer, K., Ringelhan, M., Simonavicius, N., Egger, M., Wohlleber, D., et al. 2014. Metabolic activation of intrahepatic CD8+ T cells and NKT cells causes nonalcoholic steatohepatitis and liver cancer via cross-talk with hepatocytes. *Cancer Cell* 26:549-564.
3. Schellerer, V.S., Croner, R.S., Weinländer, K., Hohenberger, W., Stürzl, M., and Naschberger, E. 2007. Endothelial cells of human colorectal cancer and healthy colon reveal phenotypic differences in culture. *Lab Invest* 87:1159-1170.
4. Naschberger, E., Schellerer, V.S., Rau, T.T., Croner, R.S., and Stürzl, M. 2011. Isolation of endothelial cells from human tumors. *Methods Mol Biol* 731:209-218.
5. Naschberger, E., Croner, R.S., Merkel, S., Dimmler, A., Tripal, P., Amann, K.U., Kremmer, E., Brueckl, W.M., Papadopoulos, T., Hohenadl, C., et al. 2008. Angiostatic immune reaction in colorectal carcinoma: Impact on survival and perspectives for antiangiogenic therapy. *Int J Cancer* 123:2120-2129.
6. Grenz, S., Naschberger, E., Merkel, S., Britzen-Laurent, N., Schaal, U., Konrad, A., Aigner, M., Rau, T.T., Hartmann, A., Croner, R.S., et al. 2013. IFN-gamma-Driven Intratumoral Microenvironment Exhibits Superior Prognostic Effect Compared with an IFN-alpha-Driven Microenvironment in Patients with Colon Carcinoma. *Am J Pathol* 183:1897-1909.
7. Stürzl, M., Roth, W.K., Brockmeyer, N.H., Zietz, C., Speiser, B., and Hofschneider, P.H. 1992. Expression of platelet-derived growth factor and its receptor in AIDS-related Kaposi sarcoma in vivo suggests paracrine and autocrine mechanisms of tumor maintenance. *Proc Natl Acad Sci U S A* 89:7046-7050.
8. Chalmers, C.R., Fenwick, S.W., Toogood, G.J., and Hull, M.A. 2006. Immunohistochemical measurement of endothelial cell apoptosis and proliferation in formalin-fixed, paraffin-embedded human cancer tissue. *Angiogenesis* 9:193-200.
